# Supplementary material for: 2013 Dengue Outbreaks in Singapore and Malaysia Caused by Different Viral Strains
Source: PubMed Central journal article supplement (PMC4458818; doi:10.4269/ajtmh.14-0588), 2015-06-03
Supplement: SD3.pdf [file SD3.pdf]

SUPPLEMENTAL TABLE 1  
DENV serotype and genotype analysis in Malaysian states in 2013

| No. | State        | Sentinel site          | Number of hospitals/clinics | Total number of samples received for dengue virology testing | Number of serotyped cases | Number of genotyped cases |
|-----|--------------|------------------------|-----------------------------|--------------------------------------------------------------|---------------------------|---------------------------|
| 1   | Perlis       | Hospitals              | 1                           | 94                                                           | 63                        | 17                        |
|     |              | Clinics                | 1                           | 36                                                           | 8                         |                           |
|     |              | Non-Sentinel/outbreak* | N/A                         | 25                                                           | 2                         |                           |
| 2   | Kedah        | Hospitals              | 1                           | 13                                                           | 1                         | 1                         |
|     |              | Clinics                | 2                           | 11                                                           | 0                         |                           |
|     |              | Non-Sentinel/outbreak* | N/A                         | 17                                                           | 1                         |                           |
| 3   | Pulau Pinang | Hospitals              | 1                           | 79                                                           | 30                        | 4                         |
|     |              | Clinics                | 1                           | 20                                                           | 1                         |                           |
|     |              | Non-Sentinel/outbreak* | N/A                         | 74                                                           | 14                        |                           |
| 4   | Perak        | Hospitals              | 2                           | 277                                                          | 49                        | 12                        |
|     |              | Clinics                | 2                           | 56                                                           | 4                         |                           |
|     |              | Non-Sentinel/outbreak* | N/A                         | 171                                                          | 15                        |                           |
| 5   | WPKL         | Hospitals              | 1                           | 226                                                          | 192                       | 66                        |
|     |              | Clinics                | 1                           | 21                                                           | 7                         |                           |
|     |              | Non-Sentinel/outbreak* | N/A                         | 239                                                          | 51                        |                           |
| 6   | Selangor     | Hospitals              | 5                           | 1510                                                         | 1105                      | 295                       |
|     |              | Clinics                | 4                           | 113                                                          | 27                        |                           |
|     |              | Non-Sentinel/outbreak* | N/A                         | 56                                                           | 10                        |                           |
| 7   | N. Sembilan  | Hospitals              | 1                           | 418                                                          | 368                       | 51                        |
|     |              | Clinics                | 0                           | 0                                                            | 0                         |                           |
|     |              | Non-Sentinel/outbreak* | N/A                         | 144                                                          | 81                        |                           |
| 8   | Melaka       | Hospitals              | 1                           | 452                                                          | 167                       | 64                        |
|     |              | Clinics                | 1                           | 138                                                          | 34                        |                           |
|     |              | Non-Sentinel/outbreak* | N/A                         | 204                                                          | 141                       |                           |
| 9   | Johor        | Hospitals              | 4                           | 1840                                                         | 802                       | 184                       |
|     |              | Clinics                | 5                           | 1368                                                         | 329                       |                           |
|     |              | Non-Sentinel/outbreak* | N/A                         | 52                                                           | 35                        |                           |
| 10  | Pahang       | Hospitals              | 1                           | 196                                                          | 86                        | 19                        |
|     |              | Clinics                | 2                           | 201                                                          | 24                        |                           |
|     |              | Non-Sentinel/outbreak* | N/A                         | 12                                                           | 1                         |                           |
| 11  | Terengganu   | Hospitals              | 2                           | 172                                                          | 39                        | 10                        |
|     |              | Clinics                | 0                           | 0                                                            | 0                         |                           |
|     |              | Non-Sentinel/outbreak* | N/A                         | 97                                                           | 15                        |                           |
| 12  | Kelantan     | Hospitals              | 1                           | 245                                                          | 69                        | 25                        |
|     |              | Clinics                | 2                           | 347                                                          | 48                        |                           |
|     |              | Non-Sentinel/outbreak* | N/A                         | 1                                                            | 0                         |                           |
| 13  | Sabah        | Hospitals              | 1                           | 159                                                          | 111                       | 12                        |
|     |              | Clinics                | 1                           | 145                                                          | 29                        |                           |
|     |              | Non-Sentinel/outbreak* | N/A                         | 6                                                            | 1                         |                           |
| 14  | Sarawak      | Hospitals              | 6                           | 108                                                          | 30                        | 9                         |
|     |              | Clinics                | 2                           | 24                                                           | 7                         |                           |
|     |              | Non-Sentinel/outbreak* | N/A                         | 13                                                           | 8                         |                           |
|     |              | TOTAL                  | 52                          | 9380                                                         | 4005                      |                           |

The table summarizes the DENV serotype and genotype analysis among NS1 positive sera collected in 2013 from both sentinel and non-sentinel/outbreak sites distributed across Malaysia. DENV = dengue virus.

\*Ad hoc testing of NS1 positive sera collected from non-sentinel/outbreak sites. Each site was aimed to send at least two samples for laboratory testing and should not exceed 10% of the total cases per site.
